# Supplementary material
Source: PubMed Central journal article supplement (PMC8767655)
Supplement: mmc1.pdf [file mmc1.pdf]

**Med, Volume 3**

**Supplemental information**

**Differential immunogenicity of homologous  
versus heterologous boost  
in Ad26.COV2.S vaccine recipients**

**Nicholas Kim Huat Khoo, Joey Ming Er Lim, Upkar S. Gill, Ruklanthi de Alwis, Nicole Tan, Justin Zhen Nan Toh, Jane E. Abbott, Carla Usai, Eng Eong Ooi, Jenny Guek Hong Low, Nina Le Bert, Patrick T.F. Kennedy, and Antonio Bertoletti**

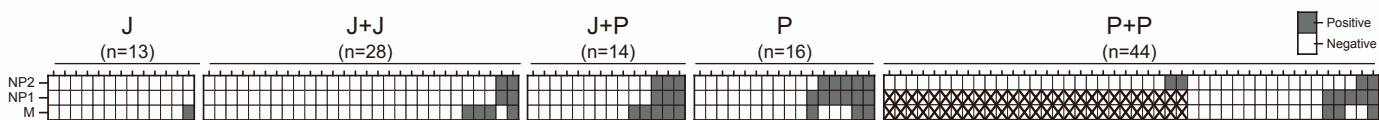

**Figure S1: Identification of convalescent vaccinated individuals. Related to Figure 1**

Heatmap shows the SARS-CoV-2 non-Spike-specific T cell responses quantified in vaccinated individuals using IFN- $\gamma$  ELISpot. Individuals with at least one positive response ( $>20$  SFC SFC/ $10^6$  PBMCs) are categorized as potentially infected vaccinees. While individuals with no positive response are categorized as naïve vaccinees. "X" denotes structural peptide pools that were untested.

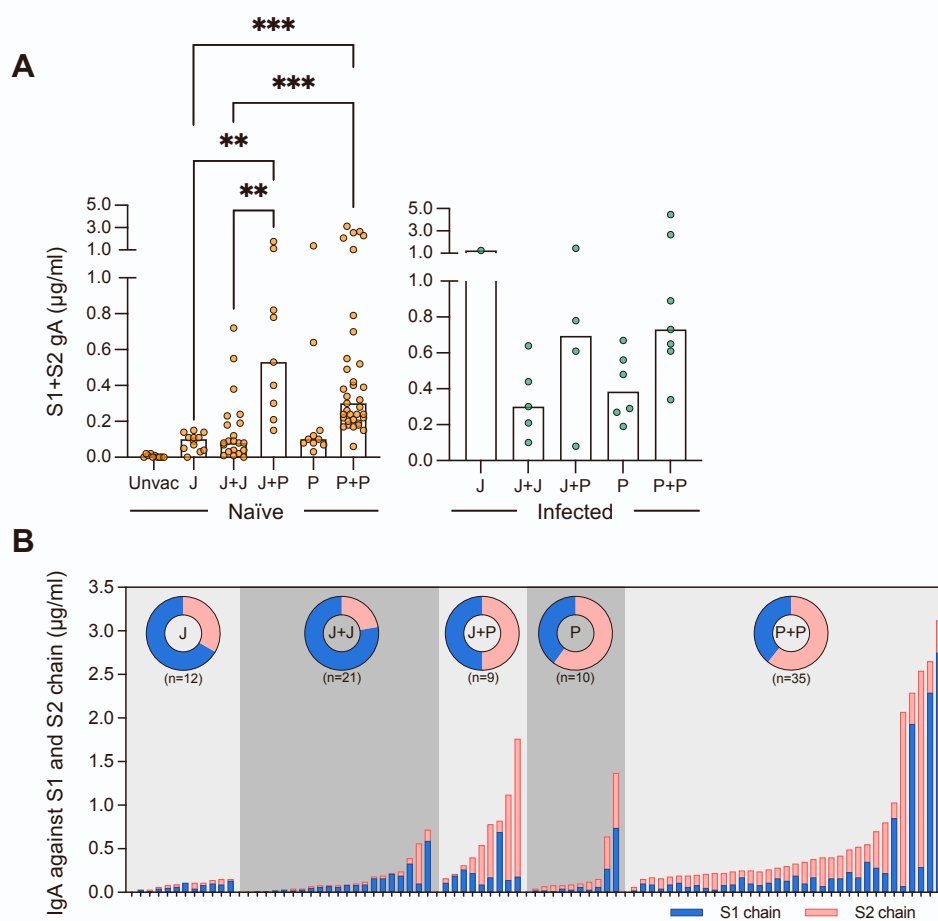

**Figure S2: Quantitative and Qualitative profile of Spike-specific IgA antibodies. Related to Figure 2**

**(A)** Spike-specific IgA antibody responses were tested in five cohorts of naïve vaccinated individuals: J (n=12), J+J (n=23), J+P (n=9), P (n=10) and P+P (n=37). Same analysis was carried out in SARS-CoV-2 convalescent vaccinated individuals: J (n=1), J+J (n=4), J+P (n=5), P (n=6) and P+P (n=7). A naïve unvaccinated cohort was used as a control, Unvac (n=10). Bars denote the median value of each group. Each dot represents an individual. Significant differences in each group were analysed by one-way ANOVA and the adjusted p-values (adjusted for multiple comparison) are shown. No significance is not shown, \* =  $P \leq 0.05$ ; \*\* =  $P \leq 0.01$ ; \*\*\* =  $P \leq 0.001$ . **(B)** Stacked bars represent IgA antibody titers against the S1 (blue) and S2 (pink) chains of SARS-CoV-2 Spike antigen. Each column represents an individual. Donut plots represent the mean of percentage of IgA antibodies against S1 or S2.

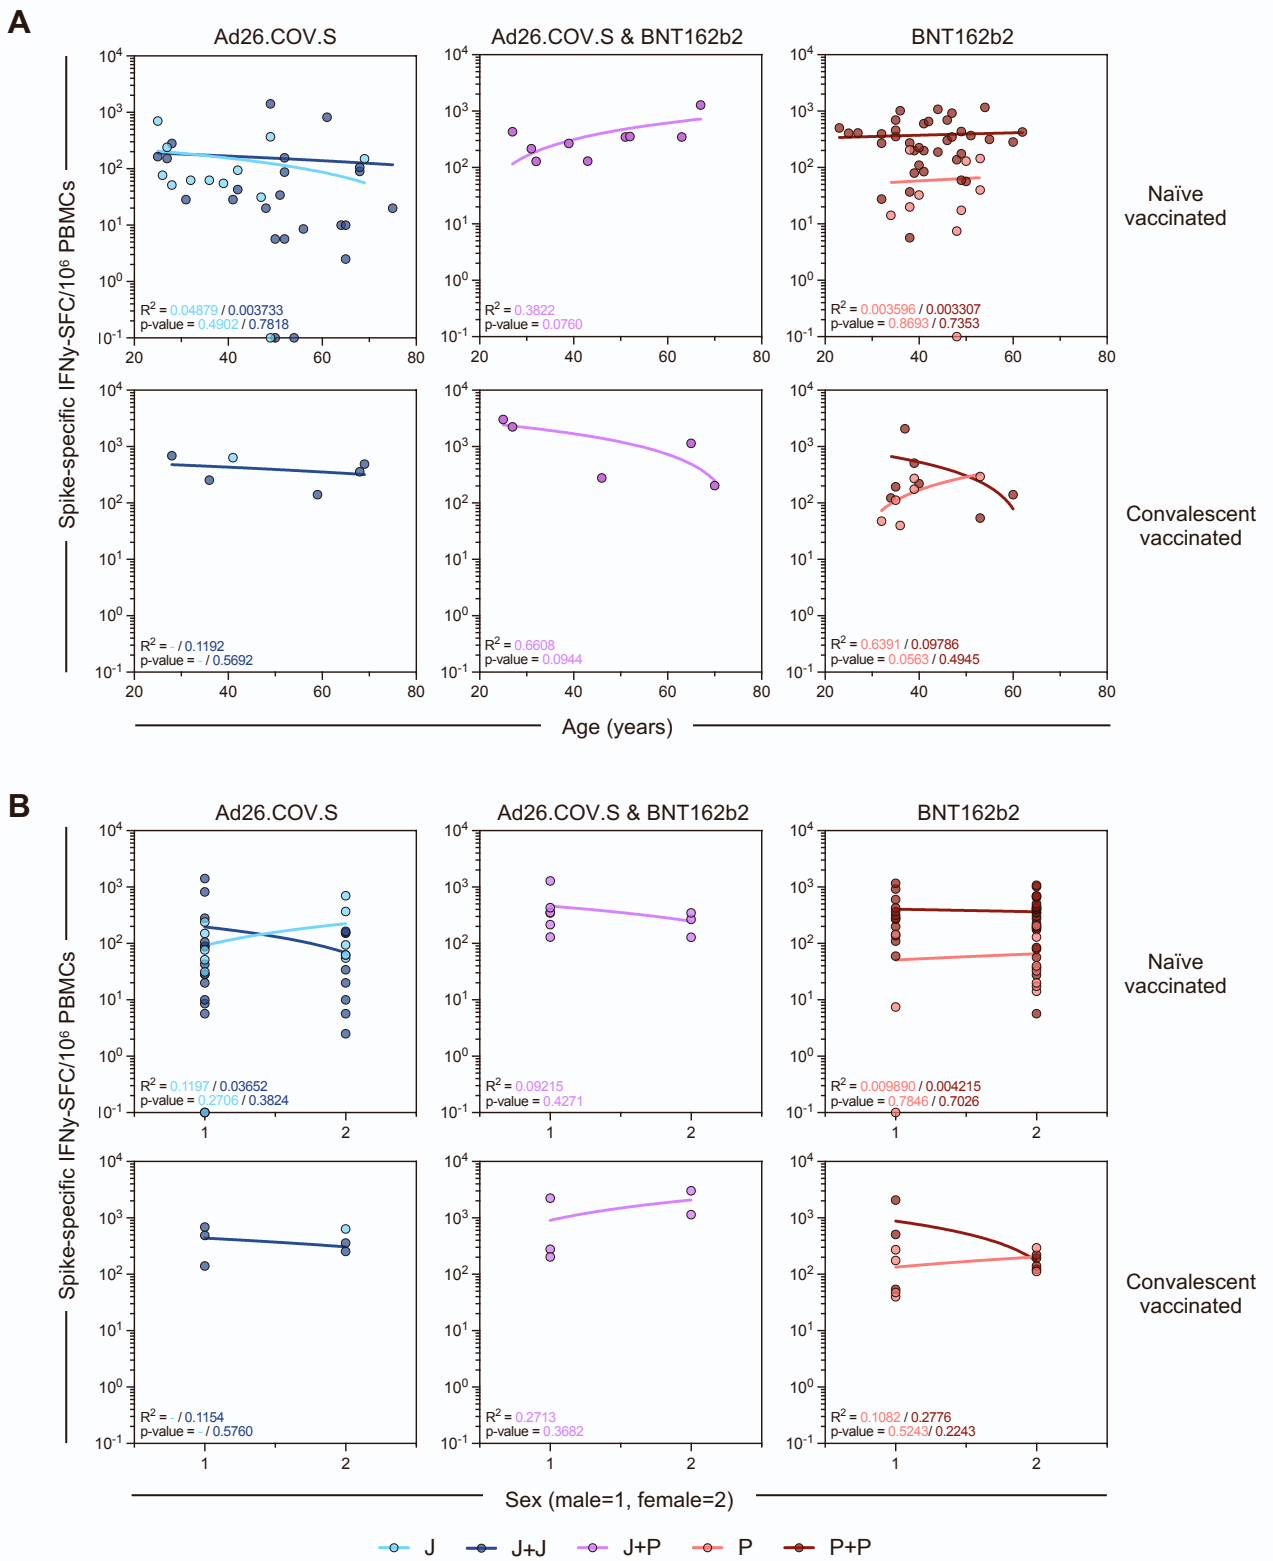

**Figure S3: Correlation of Spike-specific T cell frequency with age or sex. Related to Figure 2**

Linear regression analysis between Spike-specific T cell frequency and **(A)** age or **(B)** sex of vaccine recipients who are naïve (top panel) or convalescent (bottom panel) vaccinated individuals. Goodness of fit and p-value are shown in plots.

**Table S1: Age vs Spike-specific T cell responses. Related to Figure 2**

Data shows heterogeneity amongst the vaccinated individuals. X denotes convalescent vaccinated individuals while O denotes non-responders (as determined based on 25<sup>th</sup> percentile of total responses).

|       | Study ID | Age   | X - Infected<br>O - NonResponder | Total Spike |        |
|-------|----------|-------|----------------------------------|-------------|--------|
| J     | #107     | 41    | X                                | 638.40      |        |
|       | #017     | 25    |                                  | 702.50      |        |
|       | #108     | 26    |                                  | 76.95       |        |
|       | #113     | 27    |                                  | 239.40      |        |
|       | #120     | 28    |                                  | 51.30       |        |
|       | #025     | 32    |                                  | 62.50       |        |
|       | #023     | 36    |                                  | 62.50       |        |
|       | #026     | 39    |                                  | 55.00       |        |
|       | #121     | 42    |                                  | 94.05       |        |
|       | #096     | 47    | O                                | 31.35       |        |
|       | #093     | 49    | O                                | 0.00        |        |
| #106  | 49       |       | 367.65                           |             |        |
| #095  | 69       |       | 151.05                           |             |        |
| J+J   | #024     | 28    | X                                | 687.50      |        |
|       | #088     | 36    | X                                | 253.65      |        |
|       | #063     | 59    | X                                | 140.00      |        |
|       | #040     | 68    | X                                | 360.00      |        |
|       | #044     | 69    | X                                | 487.50      |        |
|       | #041     | 25    |                                  | 165.00      |        |
|       | #028     | 27    |                                  | 152.50      |        |
|       | #053     | 28    |                                  | 280.00      |        |
|       | #091     | 31    | O                                | 28.50       |        |
|       | #089     | 41    | O                                | 28.50       |        |
|       | #100     | 42    |                                  | 42.75       |        |
|       | #060     | 48    | O                                | 19.95       |        |
|       | #085     | 49    |                                  | 1422.15     |        |
|       | #099     | 50    | O                                | 0.00        |        |
|       | #101     | 50    | O                                | 5.70        |        |
|       | #084     | 51    | O                                | 34.20       |        |
|       | #052     | 52    |                                  | 157.14      |        |
|       | #064     | 52    |                                  | 87.50       |        |
|       | #110     | 52    | O                                | 5.70        |        |
|       | #092     | 54    | O                                | 0.00        |        |
| #090  | 56       | O     | 8.55                             |             |        |
| #046  | 61       |       | 820.00                           |             |        |
| #042  | 64       | O     | 10.00                            |             |        |
| #045  | 65       | O     | 10.00                            |             |        |
| #056  | 65       | O     | 2.50                             |             |        |
| #051  | 68       |       | 90.00                            |             |        |
| #061  | 68       |       | 105.45                           |             |        |
| #027  | 75       | O     | 20.00                            |             |        |
| J+P   | #031     | 25    | X                                | 3020.00     |        |
|       | #043     | 27    | X                                | 2237.50     |        |
|       | #012     | 46    | X                                | 277.50      |        |
|       | #020     | 65    | X                                | 1137.50     |        |
|       | #047     | 70    | X                                | 202.86      |        |
|       | #098     | 27    |                                  | 433.20      |        |
|       | #019     | 31    |                                  | 215.00      |        |
|       | #104     | 32    |                                  | 128.25      |        |
|       | #050     | 39    |                                  | 267.50      |        |
|       | #049     | 43    |                                  | 130.00      |        |
|       | #119     | 51    |                                  | 347.70      |        |
|       | #103     | 52    |                                  | 356.25      |        |
|       | #018     | 63    |                                  | 347.50      |        |
|       | #030     | 67    |                                  | 1282.50     |        |
|       | P        | #034  | 32                               | X           | 47.50  |
|       |          | #037  | 35                               | X           | 112.50 |
|       |          | #033  | 36                               | X           | 40.00  |
| #022  |          | 39    | X                                | 175.00      |        |
| #039  |          | 39    | X                                | 272.50      |        |
| #014  |          | 53    | X                                | 295.00      |        |
| #087  |          | 34    | O                                | 14.25       |        |
| #035  |          | 38    |                                  | 205.00      |        |
| #036  |          | 38    | O                                | 20.00       |        |
| #032  |          | 40    | O                                | 32.50       |        |
| #013  |          | 48    | O                                | 0.00        |        |
| #058  |          | 48    | O                                | 7.50        |        |
| #038  |          | 49    | O                                | 17.50       |        |
| #059  |          | 50    |                                  | 130.00      |        |
| #011  |          | 53    |                                  | 145.00      |        |
| #057  |          | 53    |                                  | 40.00       |        |
| P+P   |          | #123  | 34                               | X           | 122.55 |
|       |          | #116  | 35                               | X           | 193.80 |
|       |          | AT    | 37                               | X           | 2075   |
|       |          | #118  | 39                               | X           | 510.15 |
|       |          | #115  | 53                               | X           | 54.15  |
|       |          | G-033 | 40                               | X           | 220    |
|       |          | G-027 | 60                               | X           | 140.00 |
|       |          | JO    | 23                               |             | 505.00 |
|       |          | G-006 | 25                               |             | 405.00 |
|       |          | G-007 | 27                               |             | 410.00 |
|       |          | #112  | 32                               |             | 270.75 |
|       |          | G-003 | 32                               |             | 395.00 |
|       |          | G-025 | 32                               | O           | 27.50  |
|       |          | G-015 | 35                               |             | 355    |
|       | G-012    | 35    |                                  | 697.50      |        |
|       | G-032    | 35    |                                  | 457.5       |        |
|       | KK       | 36    |                                  | 1015        |        |
|       | #109     | 38    | O                                | 5.70        |        |
|       | #122     | 38    |                                  | 37.05       |        |
|       | G-022    | 38    |                                  | 272.50      |        |
|       | G-011    | 39    |                                  | 200.00      |        |
|       | G-009    | 39    |                                  | 80.00       |        |
|       | #111     | 40    |                                  | 225.15      |        |
|       | G-020    | 40    |                                  | 110.00      |        |
|       | G-005    | 41    |                                  | 602.50      |        |
|       | G-018    | 41    |                                  | 200.00      |        |
|       | G-008    | 41    |                                  | 85.00       |        |
|       | NLB      | 42    |                                  | 652.5       |        |
|       | G-004    | 44    |                                  | 187.50      |        |
|       | Ade      | 44    |                                  | 1077.5      |        |
| G-002 | 46       |       | 692.50                           |             |        |
| G-014 | 46       |       | 305.00                           |             |        |
| G-023 | 47       |       | 920.00                           |             |        |
| S-014 | 47       |       | 347.50                           |             |        |
| G-017 | 48       |       | 137.50                           |             |        |
| #117  | 49       |       | 59.85                            |             |        |
| #124  | 49       |       | 176.70                           |             |        |
| G-030 | 49       |       | 437.50                           |             |        |
| #114  | 50       |       | 57.00                            |             |        |
| G-019 | 51       |       | 370.00                           |             |        |
| G-031 | 54       |       | 1170                             |             |        |
| G-016 | 55       |       | 315                              |             |        |
| AB    | 60       |       | 282.5                            |             |        |
| S-129 | 62       |       | 427.50                           |             |        |

**Table S2: List of antibodies used for Spike-specific B cell phenotyping. Related to STAR Methods.**

| Antibody                                      | Catalogue Number | Concentration |
|-----------------------------------------------|------------------|---------------|
| Brilliant Violet 605™ anti-human CD3 Antibody | 317322           | 2:50          |
| PE-CF594 Mouse Anti-Human CD10                | 562396           | 2:50          |
| BV510 Mouse Anti-Human CD19                   | 562947           | 2:50          |
| BV421 Mouse Anti-Human CD21                   | 562966           | 1:50          |
| BV650 Mouse Anti-Human CD27                   | 563228           | 3:50          |
| PE/Cyanine7 anti-human CD38 Antibody          | 356608           | 2:50          |
| PerCP/Cyanine5.5 anti-human CD40 Antibody     | 334316           | 2:50          |
| FITC anti-human CD71 Antibody                 | 334104           | 3:50          |
| APC-Cy™7 Mouse Anti-Human CD69                | 557756           | 1:50          |
| BUV737 Mouse Anti-Human CD95                  | 564710           | 1:50          |
| Alexa Fluor® 700 anti-human IgD Antibody      | 348230           | 2:50          |
| BV786 Mouse Anti-Human IgG                    | 564230           | 2:50          |
| Brilliant Violet 711™ anti-human IgM Antibody | 314540           | 2:50          |
| LIVE/DEAD™ Fixable Blue Dead                  | L23105           | 2:1000        |
